# Supplementary material for: Faster nitrogen cycling and more fungal and root biomass in cold ecosystems under experimental warming: a meta‐analysis
Source: PubMed Central journal article supplement (PMC7027553; doi:10.1002/ecy.2938), 2019-12-31
Supplement: ECY-101-e02938-s001.pdf [file ECY-101-e02938-s001.pdf]

**Supporting Information.** Alejandro Salazar, Kathrin Rousk, Ingibjörg S. Jónsdóttir, Jean-Philippe Bellenger, and Ólafur S. Andrésón. 2019. Faster nitrogen cycling and more fungal and root biomass in cold ecosystems under experimental warming: a meta-analysis. *Ecology*.

## Appendix S1

### Supplementary figures

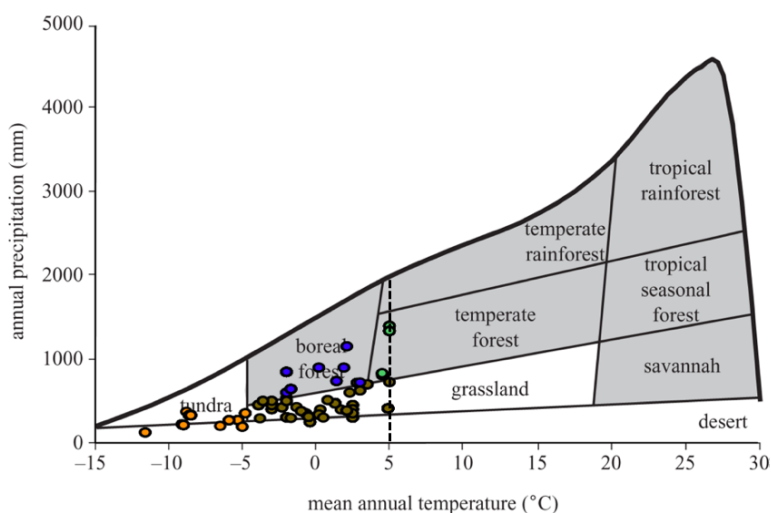

**Figure S1.** Biome classification based on MAT and MAP. The different colors of the symbols indicate when biomes were classified as tundra (orange), boreal (blue), temperate (green), and grassland (brown). One point can represent the location of multiple studies, and one study can have more than one point. Dashed line at MAT = 5 °C indicates our threshold for cold ecosystems in this meta-analysis. Studies where MAT was lower than -15 °C (not shown in figure; Lamb et al. 2011, Rossi et al. 2013) were classified as tundra. Modified with authorization from Woodward et al. (2004).

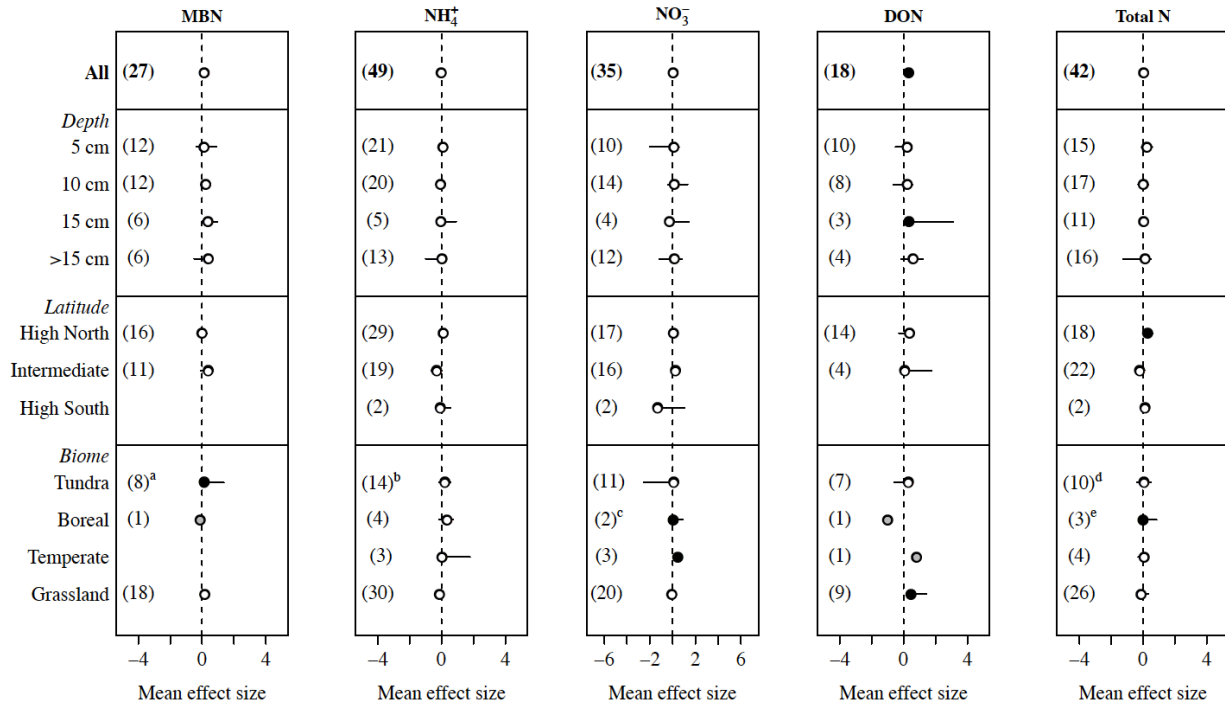

**Figure S2.** Effects of experimental warming on belowground N pools in cold ecosystems. MBN: microbial biomass N. DON: dissolved organic N. Solid and open symbols indicate statistical significance (i.e. bars showing 95% CI do not overlap with zero) and no significance, respectively. Grey symbols (without CI) are used when there is only one study. Note scale differences of x axes.

<sup>a</sup> Symbol overlaps with zero line, but mean effect size (0.128) and CI (0.207, 1.363) are both positive.

<sup>b</sup> Mean effect size (0.216) is outside the BCa bootstrapped CI (-0.906, -0.113). CI for this value in the figure (-0.135, 0.566) is not bootstrapped and, contrary to the bootstrapped CI, indicates no significance.

<sup>c</sup> Symbol overlaps with zero line, but mean effect size (0.068) and CI (0.068, 0.925) are both positive.

<sup>d</sup> BCa bootstrapped CI: (-7.962, 0.525). For simplicity, in the figure we show the non-bootstrapped CI (-0.360, 0.483), which also indicates no statistical significance.

<sup>e</sup> Symbol overlaps with zero line, but mean effect size (0.013) and CI (0.135, 0.854) are both positive.

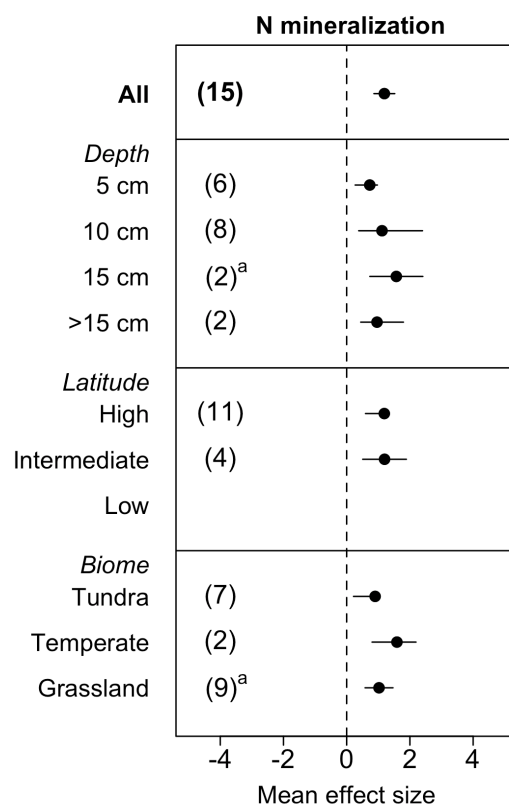

**Figure S3.** Effects of experimental warming on belowground N mineralization rates in cold ecosystems. No data found from arctic and boreal biomes. Solid symbols indicate statistical significance (i.e. bars showing 95% CI do not overlap with zero).

<sup>a</sup> Mean effect size for N mineralization values at 15 cm depth (1.571) and Grassland (1.023) are outside the BCa bootstrapped CIs (1.890, 2.226 and 1.290, 2.068; respectively). For simplicity, in the figure we show the non-bootstrapped CI (0.733, 2.408 and 0.582, 1.464; respectively), which also indicate statistical significance.

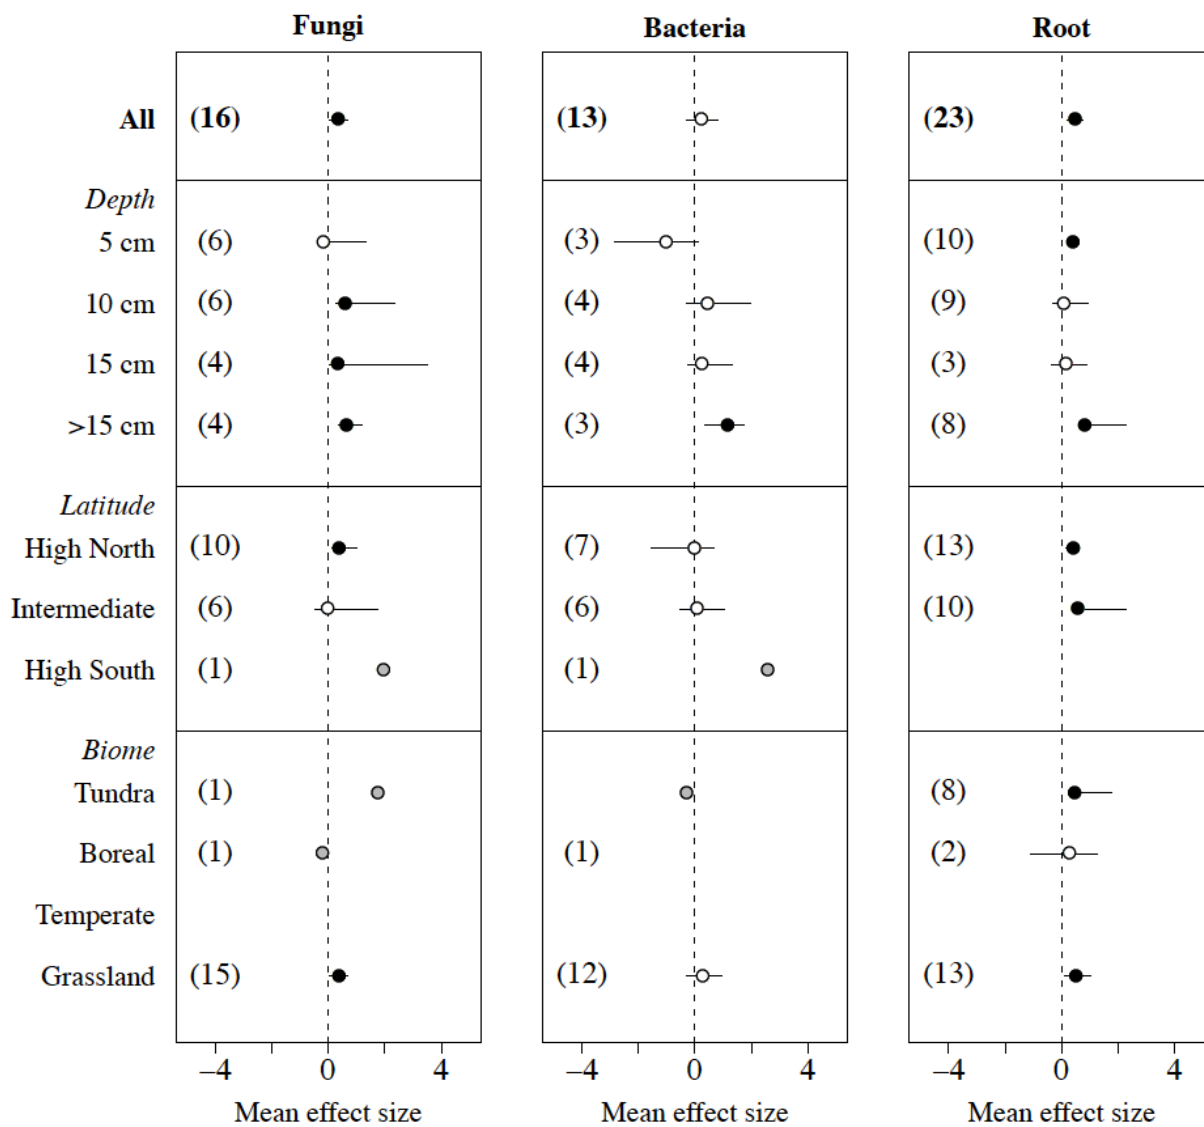

**Figure S4.** Effects of experimental warming on fungal, bacterial and root biomass (or abundance) in cold ecosystems. Solid and open symbols indicate statistical significance (i.e. bars showing 95% CI do not overlap with zero) and no significance, respectively. Grey symbols (without CI) are used when there is only one study.

## Supplementary table

**Table S1.** Meta-regression results showing the relationships, or lack of, between response variables (i.e. effect sizes of microbial biomass N (MBN), ammonium, nitrate, DON, total N (TN), N mineralization (Nmin), N fixation (Nfix), fungi, bacteria and root biomass) and temperature, moisture (i.e. differences between control and treatment plots) and length of experiment. SE: Standard Error; CI.lb: confidence interval, low bound; CI.up: confidence interval, upper bound. Significance codes:  $0.01 < P < 0.05$  ‘\*’,  $0.05 < P < 0.1$  ‘†’.

| Variable                     | Factor          | Estimate | SE    | Z value | P value | CI.lb  | CI.up  |
|------------------------------|-----------------|----------|-------|---------|---------|--------|--------|
| MBN                          | Intercept       | -0.170   | 0.554 | -0.307  | 0.759   | -1.256 | 0.916  |
|                              | Temp            | 0.663    | 0.386 | 1.72    | 0.085 † | -0.092 | 1.419  |
|                              | Moisture        | 0.106    | 0.065 | 1.619   | 0.106   | -0.022 | 0.234  |
|                              | Temp:Length     | -0.023   | 0.030 | -0.747  | 0.455   | -0.081 | 0.037  |
|                              | Temp:Moisture   | -0.080   | 0.041 | -1.986  | 0.047 * | -0.160 | -0.001 |
|                              | Moisture:Length | 0.003    | 0.002 | 1.212   | 0.225   | -0.002 | 0.007  |
| NH <sub>4</sub> <sup>+</sup> | Intercept       | -0.620   | 0.435 | -1.426  | 0.154   | -1.471 | 0.232  |
|                              | Temp            | 0.178    | 0.421 | 0.423   | 0.672   | -0.646 | 1.002  |
|                              | Moisture        | 0.007    | 0.047 | 0.149   | 0.882   | -0.086 | 0.100  |
|                              | Temp:Length     | 0.031    | 0.044 | 0.715   | 0.475   | -0.054 | 0.116  |
|                              | Temp:Moisture   | -0.009   | 0.023 | -0.373  | 0.709   | -0.054 | 0.037  |
|                              | Moisture:Length | 0.002    | 0.004 | 0.431   | 0.667   | -0.007 | 0.011  |
| NO <sub>3</sub> <sup>-</sup> | Intercept       | -0.042   | 0.454 | -0.093  | 0.926   | -0.931 | 0.847  |
|                              | Temp            | 0.029    | 0.454 | 0.064   | 0.949   | -0.861 | 0.919  |

---

|      |                 |         |       |        |         |        |       |
|------|-----------------|---------|-------|--------|---------|--------|-------|
|      | Moisture        | 0.176   | 0.163 | 1.077  | 0.282   | -0.144 | 0.496 |
|      | Temp:Length     | -0.005  | 0.064 | -0.077 | 0.939   | -0.130 | 0.120 |
|      | Temp:Moisture   | -0.08   | 0.079 | -1.009 | 0.313   | -0.234 | 0.075 |
|      | Moisture:Length | -0.034  | 0.031 | -1.105 | 0.269   | -0.094 | 0.024 |
| DON  | Intercept       | -0.560  | 0.376 | -1.489 | 0.137   | -1.298 | 0.178 |
|      | Temp            | 0.152   | 0.320 | 0.475  | 0.635   | -0.475 | 0.779 |
|      | Moisture        | -0.099  | 0.054 | -1.830 | 0.067 † | -0.205 | 0.007 |
|      | Temp:Length     | 0.014   | 0.025 | 0.556  | 0.578   | -0.036 | 0.064 |
|      | Temp:Moisture   | 0.054   | 0.031 | 1.779  | 0.075 † | -0.006 | 0.114 |
|      | Moisture:Length | -0.001  | 0.002 | -0.312 | 0.755   | -0.004 | 0.003 |
| TN   | Intercept       | 0.105   | 0.245 | 0.430  | 0.667   | -0.375 | 0.586 |
|      | Temp            | -0.079  | 0.203 | -0.392 | 0.695   | -0.476 | 0.318 |
|      | Moisture        | -0.013  | 0.018 | -0.751 | 0.453   | -0.048 | 0.022 |
|      | Temp:Length     | 0.006   | 0.026 | 0.208  | 0.836   | -0.046 | 0.057 |
|      | Temp:Moisture   | 0.007   | 0.018 | 0.396  | 0.692   | -0.027 | 0.041 |
|      | Moisture:Length | -0.0002 | 0.001 | -0.152 | 0.88    | -0.002 | 0.002 |
| Nmin | Intercept       | 0.377   | 3.122 | 0.121  | 0.904   | -5.741 | 6.496 |
|      | Temp            | -0.087  | 4.201 | -0.021 | 0.983   | -8.322 | 8.147 |
|      | Moisture        | 0.072   | 0.157 | 0.460  | 0.645   | -0.236 | 0.381 |
|      | Temp:Length     | 0.002   | 0.428 | 0.004  | 0.997   | -0.837 | 0.840 |
|      | Temp:Moisture   | 0.097   | 0.281 | 0.345  | 0.730   | -0.454 | 0.649 |
|      | Moisture:Length | -0.031  | 0.055 | -0.565 | 0.572   | -0.139 | 0.077 |
| Nfix | Intercept       | 0.223   | 1.004 | 0.222  | 0.824   | -1.746 | 2.192 |

---

---

|          |                 |        |       |        |         |        |        |
|----------|-----------------|--------|-------|--------|---------|--------|--------|
|          | Temp            | 0.148  | 1.005 | 0.147  | 0.883   | -1.822 | 2.118  |
|          | Moisture        | -0.859 | 0.436 | -1.971 | 0.049 * | -1.713 | -0.005 |
|          | Temp:Length     | -0.026 | 0.037 | -0.716 | 0.474   | -0.098 | 0.046  |
|          | Temp:Moisture   | 0.753  | 0.391 | 1.924  | 0.054 † | -0.014 | 1.519  |
|          | Moisture:Length | 0.011  | 0.005 | 2.062  | 0.039 * | 0.001  | 0.022  |
| Fungi    | Intercept       | 0.129  | 2.177 | 0.059  | 0.953   | -4.138 | 4.397  |
|          | Temp            | 2.392  | 3.038 | 0.787  | 0.431   | -3.562 | 8.346  |
|          | Moisture        | 0.350  | 0.461 | 0.759  | 0.448   | -0.553 | 1.254  |
|          | Temp:Length     | -0.415 | 0.44  | -0.943 | 0.346   | -1.277 | 0.448  |
|          | Temp:Moisture   | -0.693 | 0.772 | -0.897 | 0.370   | -2.207 | 0.821  |
|          | Moisture:Length | 0.157  | 0.173 | 0.908  | 0.364   | -0.182 | 0.495  |
| Bacteria | Intercept       | 0.161  | 1.216 | 0.132  | 0.895   | -2.223 | 2.545  |
|          | Temp            | 3.990  | 1.914 | 2.085  | 0.037 * | 0.239  | 7.742  |
|          | Moisture        | 3.301  | 1.896 | 1.741  | 0.082 † | -0.415 | 7.016  |
|          | Temp:Length     | -1.020 | 0.459 | -2.223 | 0.026 * | -1.919 | -0.121 |
|          | Temp:Moisture   | -2.373 | 1.284 | -1.848 | 0.065 † | -4.89  | 0.143  |
|          | Moisture:Length | -0.241 | 0.213 | -1.129 | 0.259   | -0.659 | 0.178  |
| Roots    | Intercept       | 0.543  | 0.707 | 0.768  | 0.443   | -0.843 | 1.930  |
|          | Temp            | -0.619 | 0.597 | -1.036 | 0.300   | -1.789 | 0.552  |
|          | Moisture        | -0.077 | 0.070 | -1.093 | 0.275   | -0.214 | 0.061  |
|          | Temp:Length     | 0.039  | 0.053 | 0.731  | 0.465   | -0.065 | 0.143  |
|          | Temp:Moisture   | 0.010  | 0.033 | 0.300  | 0.764   | -0.055 | 0.075  |
|          | Moisture:Length | 0.005  | 0.010 | 0.485  | 0.628   | -0.015 | 0.025  |

---

## References

Lamb, E. G., Han, S., Lanoil, B. D., Henry, G. H., Brummell, M. E., Banerjee, S., Siciliano, S.

D. (2011). A High Arctic soil ecosystem resists long-term environmental manipulations.

*Global Change Biology*, 17(10), 3187-3194.

Rossi, S., Bordeleau, A., Morin, H., Houle, D. (2013). The effects of N-enriched rain and

warmer soil on the ectomycorrhizae of black spruce remain inconclusive in the short term.

*Annals of Forest Science*, 70(8), 825-834.

Woodward, F. I., Lomas, M. R., Kelly, C. K. (2004). Global climate and the distribution of plant

biomes. *Philosophical Transactions of the Royal Society of London. Series B: Biological*

*Sciences*, 359(1450), 1465-1476.
