# Supplementary material for: Faster nitrogen cycling and more fungal and root biomass in cold ecosystems under experimental warming: a meta‐analysis
Source: PubMed Central journal article supplement (PMC7027553; doi:10.1002/ecy.2938), 2019-12-31
Supplement: ECY-101-e02938-s003.pdf [file ECY-101-e02938-s003.pdf]

**Alejandro Salazar, Kathrin Rousk, Ingibjörg S. Jónsdóttir, Jean-Philippe Bellenger, Ólafur S. Andrússon. 2019. Faster nitrogen cycling and more fungal and root biomass in cold ecosystems under experimental warming: a meta-analysis. *Ecology*.**

---

## **Data S1**

**Biomass, enzymatic, genetic, biogeochemical and environmental data of control and experimentally warmed plots in the 100 datasets (94 studies) reviewed in this meta-analysis. Details of each experimental site (i.e. coordinates, MAT, MAP, soil depths, biome classification, averaged temperature and moisture difference between control and treatment plots, duration of warming experiment, and references) are also included.**

---

## **Authors**

Author Name: Alejandro Salazar Villegas

Affiliation: Faculty of Life and Environmental Sciences, University of Iceland.

Address: Sturlugata 7, 101 Reykjavík, Iceland.

Email: alejandro.salazar-villegas@fulbrightmail.org

Author Name: Kathrin Rousk

Affiliation: Department of Biology, Terrestrial Ecology Section, University of Copenhagen; Center for Permafrost (CENPERM), University of Copenhagen.

Address: Universitetsparken 15, 2100 Copenhagen, Denmark; Øster Voldgade 10, 1350 Copenhagen, Denmark.

Email: kathrin.rous@bio.ku.dk

Author Name: Ingibjörg S. Jónsdóttir

Affiliation: Faculty of Life and Environmental Sciences, University of Iceland.

Address: Sturlugata 7, 101 Reykjavík, Iceland.

Email: isj@hi.is

Author Name: Jean-Philippe Bellenger

Affiliation: Centre Seve, Department of Chemistry, Faculty of Sciences, Université de Sherbrooke.

Address: J1K2R1 QC, Canada.

Email: Jean-Philippe.Bellenger@usherbrooke.ca

Author Name: Ólafur S. Andrússon

Affiliation: Faculty of Life and Environmental Sciences, University of Iceland.

Address: Sturlugata 7, 101 Reykjavík, Iceland.  
Email: osa@hi.is

---

## File list

raw\_data.csv

## Description

Abbreviations

All headings contain the letter c – Control plots

All headings contain the letter w – Warmed plots

n (columns E and DS) – Number of replicates

se – standard error

sd – standard deviation

MicN – Microbial biomass N

DON – Dissolved Organic N

NH<sub>4</sub> – Ammonium

NO<sub>3</sub> – Nitrate

TSN – Total soil N

Nfix – N fixation

Nmin – N mineralization

Nnit – N nitrification

Namo – N ammonification

N<sub>2</sub>O – N<sub>2</sub>O emissions

Ure – Urease activity

Pro - Protease activity

LAP - Leucine aminopeptidase (LAP) activity

NAG - N-acetylglucosaminidase (NAG) activity

PO - Phenoloxidase (PO) activity

POX - Peroxidase (POX) activity

Bac - Bacterial biomass

GramP - Gram positive

GramN - Gram negative

Act - Actinobacteria

Aci - Acidobacteria

Apr -  $\alpha$ -proteobacteria

Fun - Fungal biomass

AMF - Arbuscular mycorrhiza

EM - Ectomycorrhizae

Arch - Archaea

BacF - Bacterivore

FunF - Fungivore

BamoA - Bacterial amoA

AamoA - Archaeal amoA

nosZ - nosZ

nifH - nifH

nirK - nirK

nirS - nirS

root - Root biomass

root N - Root N content

ST - Soil temperature

SM - Soil moisture

pH - Soil pH

---
